# Supplementary material
Source: publisher figshare collection journal article supplement (https://frontiersin.figshare.com/ndownloader/files/34129962)
Supplement: Supplementary file [file 34129962]

## Supplementary materials:

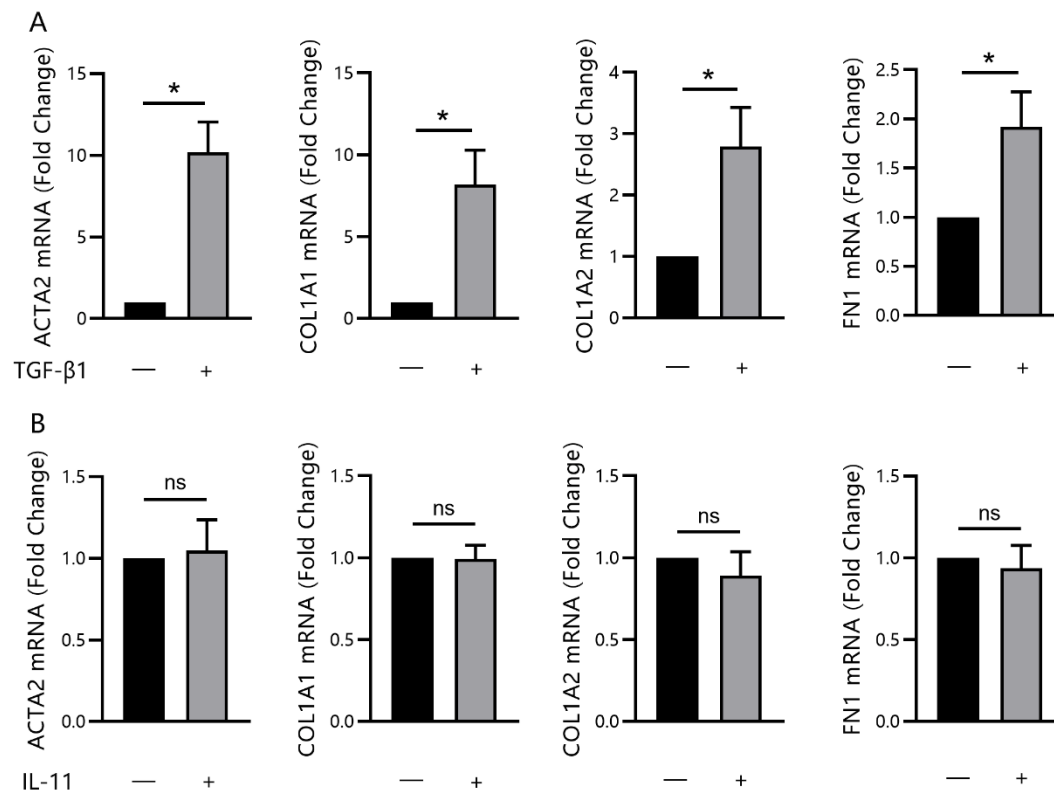

**Supplementary Figure S1.** No effect of IL-11 on expression of fibrosis-related markers was observed.

**(A, B)** Quantitative real-time polymerase chain reaction (qRT-PCR) of ACTA2, COL1A1, COL1A2 and FN1 expression in orbital fibroblasts (OFs) after stimulation with TGF-β1 (10ng/ml, 24 h) or IL-11 (10ng/ml, 24 h). TAO, n = 3; Control, n = 3.

The data are expressed as the mean  $\pm$  standard deviation (SD). \*  $P < 0.05$  as compared with the control; ns denotes no statistical significance; assessed by Mann-Whitney test.
